# Supplementary material for: Comparative evaluation of leukocyte- and platelet-rich plasma and pure platelet-rich plasma for cartilage regeneration
Source: PubMed Central journal article supplement (PMC5339695; doi:10.1038/srep43301), 2017-03-07
Supplement: srep43301-s1.pdf [file srep43301-s1.pdf]

**Comparative evaluation of leukocyte- and platelet-rich plasma and  
pure platelet-rich plasma for cartilage regeneration**

Zhengliang Xu<sup>1\*</sup>, Wenjing Yin<sup>1\*</sup>, Yuelei Zhang<sup>1</sup>, Xin Qi<sup>1</sup>, Yixuan Chen<sup>1</sup>, Xuetao Xie<sup>1</sup>,

Changqing Zhang<sup>1</sup>

1. Department of Orthopaedic Surgery, Shanghai Jiao Tong University Affiliated  
Sixth People's Hospital, Shanghai, China.

Zhengliang Xu and Wenjing Yin are co-first authors of this article.

Corresponding authors:

Changqing Zhang (e-mail: zhangcq@sjtu.edu.cn), Xuetao Xie (e-mail:  
xiexuetao1982@163.com).

Address: Department of Orthopaedic Surgery, Shanghai Jiao Tong University  
Affiliated Sixth People's Hospital, 600 Yishan Road, Shanghai 200233, People's  
Republic of China.

Telephone: +86-21-64369181

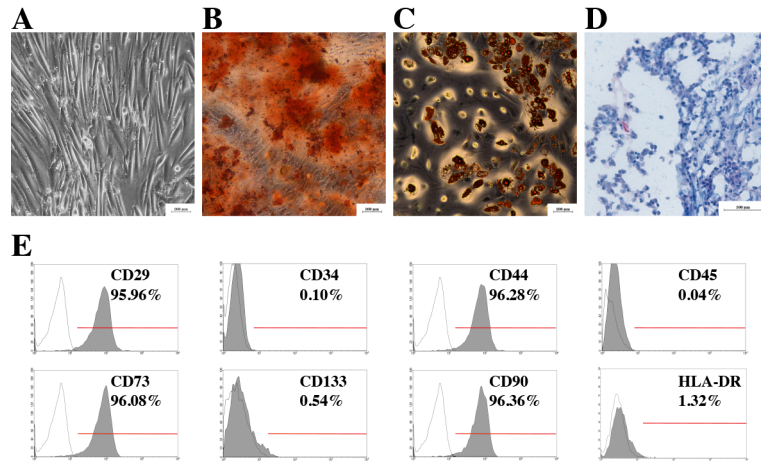

**Figure S1. Identification of rBMSC.** (A) microscopic appearance of rBMSC; (B) osteogenic differentiation of rBMSC was evaluated by alizarin red staining after osteogenic differentiation induction for 3 weeks; (C) adipogenic differentiation of rBMSC was evaluated by oil red O staining after adipogenic differentiation induction for 2 weeks; (D) chondrogenic differentiation of rBMSC was evaluated by alcian blue staining after chondrogenic differentiation induction for 4 weeks; (E) surface marker identification was performed by flow cytometry.

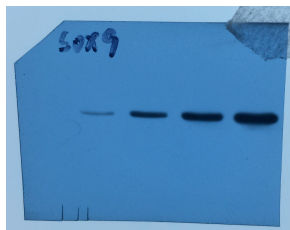

Figure 3B-Sox9

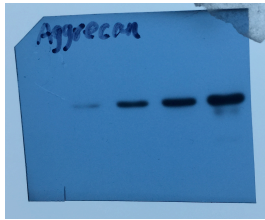

Figure 3B-Aggrecon

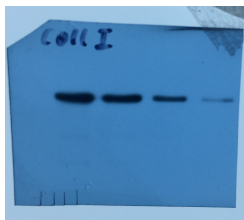

Figure 3B-Col I

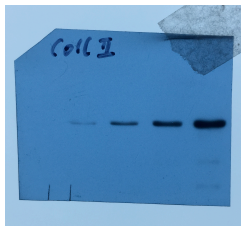

Figure 3B-Col II

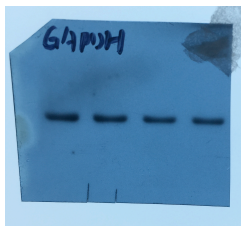

Figure 3B-GAPDH

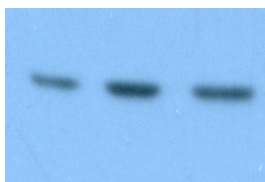

Figure 4B-NF- $\kappa$ B p65

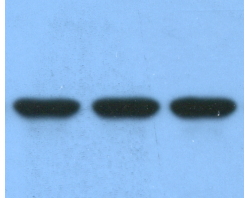

Figure 4B GAPDH
